# Supplementary material
Source: publisher figshare collection journal article supplement (https://tandf.figshare.com/ndownloader/files/21698289)
Supplement: Supplementary file 1 [file 21698289]

**Table 1**. Clinical and laboratory parameters at inclusion/baseline.

|  | 1st – line DMTs (N=39) | NTZ (N=34) | FTY (N=14) | SPMS (N=9) | HC (N=6) | pa | pb |
| --- | --- | --- | --- | --- | --- | --- | --- |
| Age (years) | 40.26±1.61 | 40.53±1.87 | 37±1.86 | 47.67±3.38 | 32.33±1.75 | 0.037 | control vs. SPMS: 0.037 |
| Gender (m/f) | 12/27 | 14/20 | 1/13 | 5/4 | 3/3 | 0.093 | N/A |
| EDSS score | 3.15±0.27 | 4.22±0.28 | 3.25±0.47 | 5.06±0.64 | N/A | 0.005 | 1st – line DMTs vs. SPMS: 0.02 |
| Disease duration (years) | 9.68±0.96 | 13.88±1.27 | 13.43±1.54 | 18.67±3.4 | N/A | 0.003 | 1st – line DMTs vs. SPMS: 0.004 |
| Duration of the respective treatment (months) | 56.63±8.89 | 46.76±6.42 | 21.6±3.29 | N/A | N/A | 0.045 | 1st – line DMTs vs. FTY: 0.039 |
| Number of first-line DMTs prior to inclusion | 0.59±1.63 | 1.53±0.2 | 1.71±0.34 | 1.22±0.46 | N/A | 0.002 | 1st – line DMTs vs. NTZ: 0.004  1st – line DMTs vs. FTY: 0.013 |
| Serum Anti-JCV Ab status: Number of positive / negative patients (% of positive patients) | 29/10 (74.35) | 9/25 (26.47) | 14/0 (100) | 8/1 (88.88) | 5/1 (83.33) | <0.001 | N/A |
| Serum Anti-JCV Ab index | 2.04±0.22 | 0.39±0.72 | 2.41±0.24 | 1.71±0.4 | 1.92±0.45 | <0.001 | control vs. NTZ: 0.016;  1st – line DMTs vs. NTZ: <0.001  NTZ vs. FTY: <0.001  NTZ vs. SPMS: 0.013 |
| absolute WBC [x103] | 6.83±0.28 | 7.62±0.31 | 5.58±0.57 | 8.13±1.24 | 6.85±0.56 | 0.015 | FTY vs. NTZ: 0.021  FTY vs. SPMS: 0.041 |
| % lymphocytes | 30.57±1.68 | 40.02±1.45 | 15.46±2.69 | 29±1.56 | 31.85±3.18 | <0.001 | FTY vs. control: 0.005  FTY vs. 1st – line DMTs: <0.001  FTY vs. NTZ: <0.001  FTY vs. SPMS: 0.009  NTZ vs. 1st – line DMTs: <0.001  NTZ vs. SPMS: 0.02 |
| absolute lymphocytes [x103] | 2.08±0.14 | 3.02±0.16 | 0.87±0.2 | 2.46±0.52 | 2.17±0.28 | <0.001 | FTY vs. 1st – line DMTs: 0.001  FTY vs. NTZ: <0.001  FTY vs. SPMS: 0.001  NTZ vs. 1st – line DMTs: <0.001 |
| % neutrophils | 60.08±1.72 | 48.44±1.58 | 75.04±2.91 | 61.26±1.41 | 61.45±3.33 | <0.001 | FTY vs. 1st – line DMTs: <0.001  FTY vs. NTZ: <0.001  FTY vs. SPMS: 0.013  NTZ vs. 1st – line DMTs: <0.001  NTZ vs. SPMS: 0.007 |
| absolute neutrophils [x103] | 4.13±0.22 | 3.7±0.2 | 4.24±0.54 | 4.9±0.65 | 4.22±0.44 | 0.216 | N/A |
| % CD4(+) T-cells | 41.47±1.39 | 35.84±1.58 | 15.92±3.78 | 45.74±1.87 | 38.12±2.22 | <0.001 | FTY vs. control: <0.001  FTY vs. 1st – line DMTs: <0.001  FTY vs. NTZ: <0.001  FTY vs. SPMS: <0.001 |
| absolute CD4(+) T-cells [x103] | 0.88±0.08 | 1.08±0.74 | 0.2±0.09 | 1.14±0.25 | 0.84±0.15 | <0.001 | FTY vs. 1st – line DMTs: <0.001  FTY vs. NTZ: <0.001  FTY vs. SPMS: <0.001 |
| % CD4(+)CD62L(+) T-cells | 79.1±1.17 | 69.39±1.73 | 54.93±5.7 | 76±1.78 | 72.38±3.73 | <0.001 | FTY vs. control: 0.017  FTY vs. 1st – line DMTs: <0.001  FTY vs. NTZ: 0.001  FTY vs. SPMS: <0.001  NTZ vs. 1st – line DMTs: 0.003 |
| MFI CD62L | 75.97±5.99 | 53.12±3.85 | 57.36±5.13 | 91.44±13.58 | 71.9±34.73 | 0.01 | NTZ vs. SPMS: 0.035 |

IFNβ, interferon-β; GA, glatiramer acetate; NTZ, natalizumab; FTY, fingolimod; HC, healthy controls; EDSS, Expanded Disability Status Scale; DMTs, disease-modifying treatments; SPMS, secondary progressive multiple sclerosis; JCV, John Cunningham virus; Ab, antibody. a overall comparison; b significant pairwise post-Hoc comparisons are indicated. Values represent mean ± Standard Error.
